# Supplementary material
Source: MDPI journal article supplement (https://www.mdpi.com/2079-6412/8/3/101)
Supplement: s1 [file s1]

## Supplementary Materials

For a better understanding of the evolution of the microorganism population on the coated silk samples, a digital mapping of the contaminated areas was conducted and the respected areas were measured, as shown in Figure S1.

The 44.0% of the surface of the silk sample coated by Siloxane was contaminated (Figure S1a). The silk samples coated by Siloxane+AM (Figure S1b) and Siloxane+SiO<sub>2</sub> (Figure S1c) show roughly the same degree of contamination, as the relative contaminated areas were 28.4% and 30.2%, respectively. This result is in agreement with the observation which was based on the photographs of Figure 4b,c (main article). Finally the sample which was coated by Siloxane+AM+SiO<sub>2</sub> is practically free of contamination. The result of Figure 1Sd showed that only the 6.9% of the total area was contaminated whereas the remaining 93.1% was free of microorganisms.

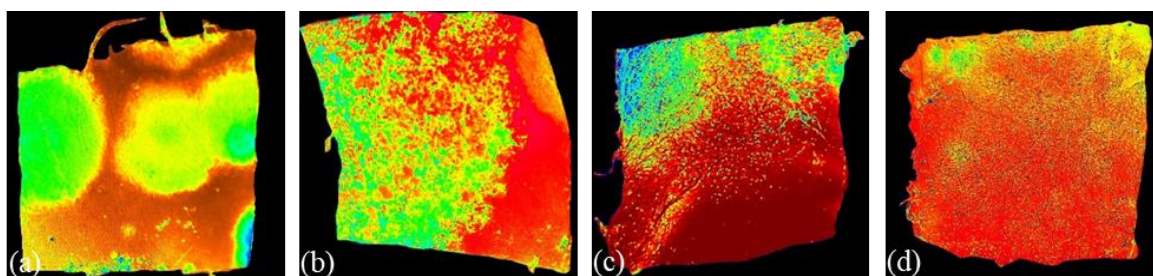

**Figure S1.** Mapping of samples after their exposure to microorganisms. Contaminated areas correspond to blue-green-yellow regions and areas free of contamination are designated by red regions. Silk samples were coated by (a) Siloxane, (b) Siloxane+AM, (c) Siloxane+SiO<sub>2</sub> and (d) Siloxane+AM+SiO<sub>2</sub>. The % relative contaminated areas are measured as follows: (a) 44.0%, (b) 28.4%, (c) 30.2% and (d) 6.9%.

Figure S2 shows the absorption measurements which were carried out in potato dextrose agars, used for microorganism cultivation on silk samples coated by Siloxane+AM, Siloxane+SiO<sub>2</sub> and Siloxane+AM+SiO<sub>2</sub>. For comparison, the absorption curve of agar in which no silk sample was immersed is included. The results reveal a rich microbial load in the agar used for the treatment of silk which was coated by Siloxane+AM. Moreover, the experimental curves indicate that the microbial load attached on the silk sample coated by Siloxane+AM+SiO<sub>2</sub> is significantly lower, compared to the silk samples treated with compositions that include either Siloxane+AM or Siloxane+SiO<sub>2</sub>. Interestingly, the silk sample, which is coated by Siloxane+SiO<sub>2</sub>, appears to carry a lower microbial load, compared to the sample treated with Siloxane+AM. The SiO<sub>2</sub> nanoparticles induce superhydrophobicity and therefore they practically inhibit the attachment of the microorganisms onto the treated silk surface. The qualitative comparison of the Siloxane+AM or Siloxane+SiO<sub>2</sub> coatings that was carried out previously in Figure S1 (and in Figure 4 of the main article) suggested that the antimicrobial properties of the two coatings are not different. However, the quantitative results of Figure S2 show that the Siloxane+SiO<sub>2</sub> coating offers a better protection against microbial attack than the Siloxane+AM coating, thus demonstrating the multiple beneficial properties induced by the use of superhydrophobic coatings.

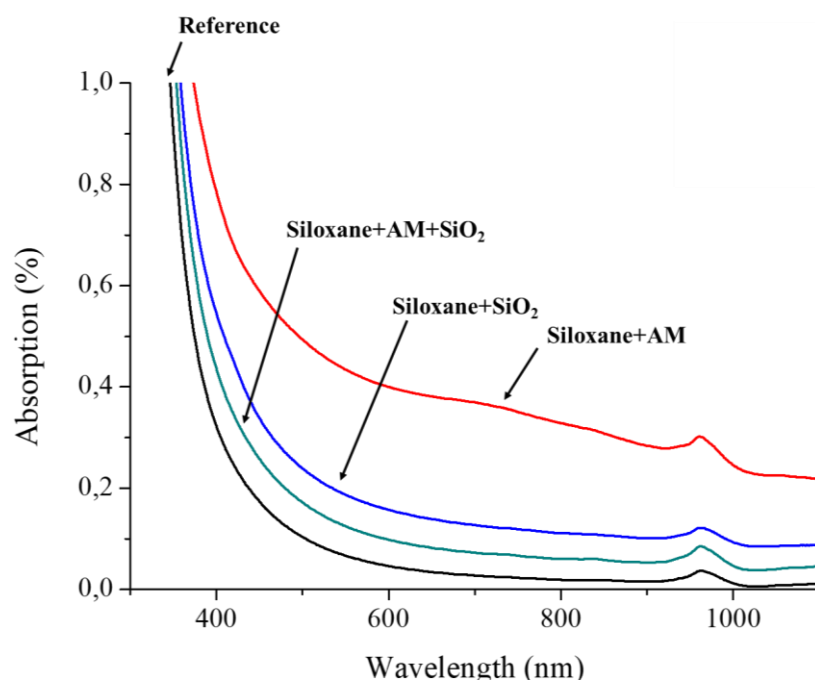

**Figure S2.** Absorption curves measured for potato dextrose agars (culture media). Agars were used for microorganism development on three samples coated by Siloxane+AM, Siloxane+SiO<sub>2</sub> and Siloxane+AM+SiO<sub>2</sub>. For comparison, the absorption curve of agar in which no silk sample was immersed is included (reference sample).
